# Supplementary material for: Theoretical studies on the intramolecular cyclization of 2,4,6-t-Bu3C6H2P=C: and effects of conjugation between the P=C and aromatic moieties
Source: publisher site journal article supplement (doi:10.3762/bjoc.10.103), 2014-05-07
Supplement: Additional file 1 [file 1860-5397-10-103-S1.pdf]

# Supporting Information

for

## Theoretical studies on the intramolecular cyclization of 2,4,6-*t*-Bu<sub>3</sub>C<sub>6</sub>H<sub>2</sub>P=C: and effects of conjugation between the P=C and aromatic moieties

Masaaki Yoshifuji<sup>1\*</sup> and Shigekazu Ito<sup>1,2</sup>

Address: <sup>1</sup>Department of Chemistry, Graduate School of Science, Tohoku University, Aoba, Sendai 980-8578, Japan and <sup>2</sup>Present address: Department of Applied Chemistry, Graduate School of Science and Engineering, Tokyo Institute of Technology, Meguro, Tokyo 152-8552, Japan

Email: Masaaki Yoshifuji - yoshifj@m.tohoku.ac.jp

\* Corresponding author

**UV Spectra for 2 and Mes\*P=C(H)Me and MO for 2 and Mes\*P=CH<sub>2</sub>**

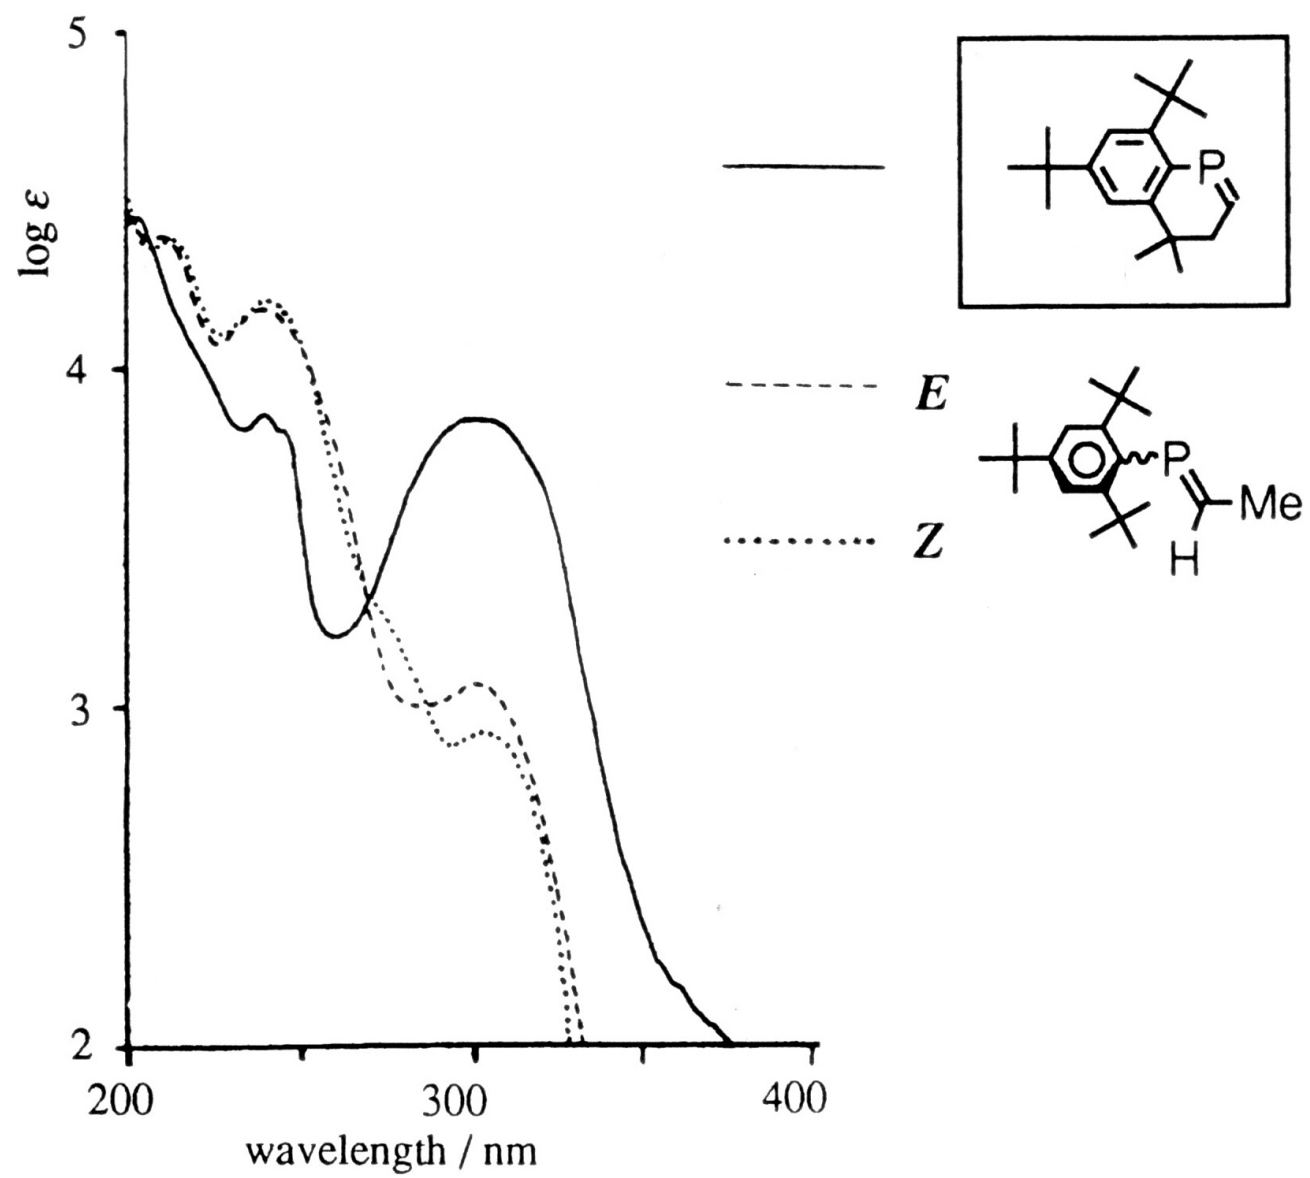

# Molecular Orbital: Phosphaalkene

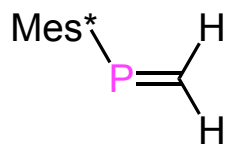

LUMO  
-0.180 eV

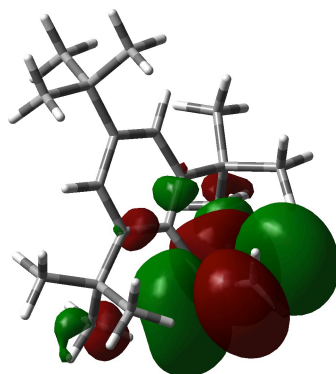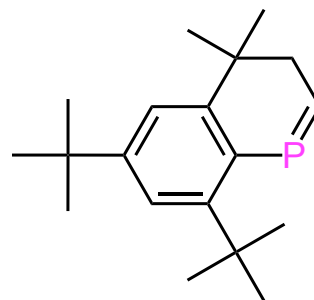

LUMO  
-0.422 eV

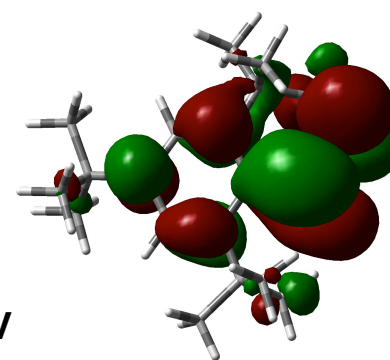

HOMO  
-7.64 eV

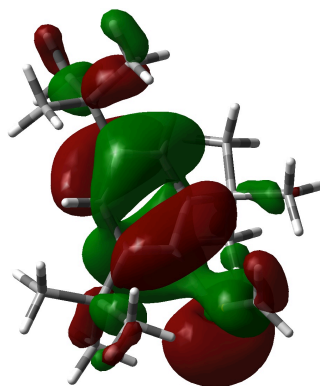

HOMO  
-7.34 eV

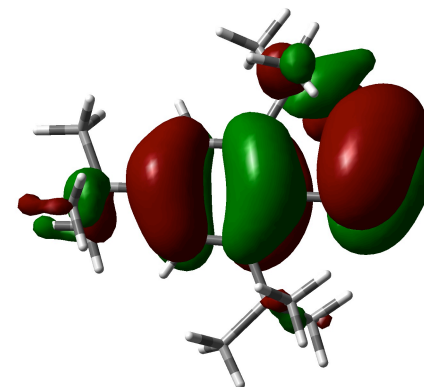

HOMO-1  
-7.95 eV

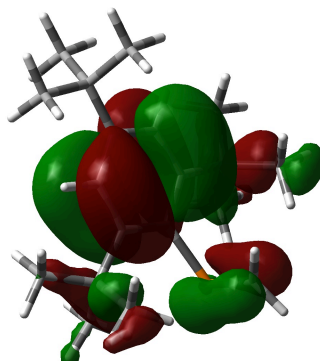

HOMO-1  
-8.01 eV

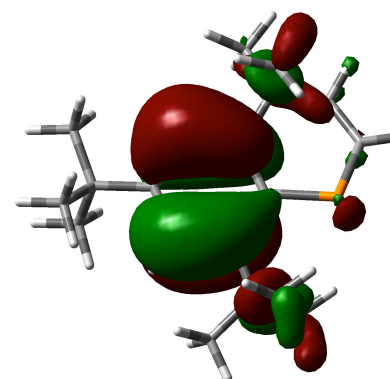

CAM-B3LYP/DGDZVP
